# Supplementary material for: Copy-number variants in clinical genome sequencing: deployment and interpretation for rare and undiagnosed disease
Source: PubMed Central journal article supplement (PMC6752263; doi:10.1038/s41436-018-0295-y), 2018-10-08
Supplement: 41436_2018_295_MOESM1_ESM.pdf [file 41436_2018_295_MOESM1_ESM.pdf]

## **Supplementary data accompanying the manuscript:**

# Copy number variants in clinical genome sequencing: deployment and interpretation for rare and undiagnosed disease

Andrew M Gross PhD<sup>1</sup>, Subramanian S. Ajay PhD<sup>1</sup>, Vani Rajan MS<sup>1</sup>, Carolyn Brown CGC<sup>1</sup>, Krista Bluske PhD<sup>1</sup>, Nicole J Burns MS<sup>1</sup>, Aditi Chawla PhD<sup>1</sup>, Alison J Coffey PhD<sup>1</sup>, Alka Malhotra PhD<sup>1</sup>, Alicia Scocchia MS CGC<sup>1</sup>, Erin Thorpe MS CGC<sup>1</sup>, Natasa Dzidic MS<sup>2</sup>, Karine Hovanes PhD FACMG<sup>2</sup>, Trilochan Sahoo MD FACMG<sup>2</sup>, Egor Dolzhenko PhD<sup>1</sup>, Bryan Lajoie PhD<sup>1</sup>, Amirah Khouzam MS CGC<sup>3</sup>, Shimul Chowdhury PhD FACMG<sup>4</sup>, John Belmont MD PhD<sup>1</sup>, Eric Roller PhD<sup>1</sup>, Sergii Ivakhno PhD<sup>5</sup>, Stephen Tanner PhD<sup>1</sup>, Julia McEachern PA MHS<sup>1</sup>, Tina Hambuch PhD FACMG<sup>3</sup>, Michael Eberle PhD<sup>1</sup>, R Tanner Hagelstrom PhD FACMG<sup>1</sup>, David R Bentley PhD<sup>5</sup>, Denise L Perry MS CGC<sup>1</sup> and Ryan J Taft PhD<sup>1,\*</sup>

<sup>1</sup> Illumina Inc., 5200 Illumina Way, San Diego, CA, USA

<sup>2</sup> CombiMatrix (currently Invitae), Irvine, CA, USA

<sup>3</sup> Invitae Corporation, San Francisco, CA, USA

<sup>4</sup> Rady Children's Institute for Genomic Medicine and Rady Children's Hospital

<sup>5</sup> Illumina Cambridge Ltd., Chesterford Research Park, Little Chesterford, UK

# Table of Contents

|                                                                                                   |           |
|---------------------------------------------------------------------------------------------------|-----------|
| <b>Supplemental Figures .....</b>                                                                 | <b>3</b>  |
| Figure S1. Inspection of Coriell GS CNVs in microarray data. ....                                 | 3         |
| Figure S2. CNV filtering pipeline. ....                                                           | 4         |
| Figure S3. Summary of manual curation and variant annotation across the CNV clinical cohort. .... | 5         |
| Figure S4. Example CNV visualization used for CNV interpretation. ....                            | 6         |
| Figure S5. Complex rearrangement in subject P11. ....                                             | 8         |
| Figure S6. Read support for unbalanced translocation in subject P7.....                           | 9         |
| Figure S7. Depth at CNV breakpoints for a mosaic unbalanced translocation in subject P6.....      | 10        |
| Figure S8. Depth across chromosomes for subject P6 with mosaic trisomy 14.....                    | 11        |
| <b>Supplemental Tables.....</b>                                                                   | <b>12</b> |
| Table S1: Coriell reference CNV call coordinates. ....                                            | 12        |
| Table S2. Sensitivity of cGS and clinical microarrays to annotated CNVs in cell-lines. ....       | 14        |
| Table S3. Coordinates of reported variants from RUGD cases. ....                                  | 15        |
| <b>Supplemental Note.....</b>                                                                     | <b>16</b> |
| Manual Inspection of NA12878 calls with partial PacBio/BioNano overlap .....                      | 16        |
| Manual Inspection of Coriell CNV Calls.....                                                       | 19        |
| Manual Inspection of Coriell CNV Calls.....                                                       | 19        |
| Manual Inspection of Calls with Less Than 75% Reciprocal Overlap .....                            | 21        |
| Manual Inspection of False Negative Coriell CNV Calls .....                                       | 24        |
| Microarray confirmation of CNVs .....                                                             | 28        |
| <i>de novo</i> CNV phasing models.....                                                            | 35        |
| Deletion phasing.....                                                                             | 35        |
| Gain phasing.....                                                                                 | 37        |
| <b>Supplemental References .....</b>                                                              | <b>39</b> |

## Supplemental Figures

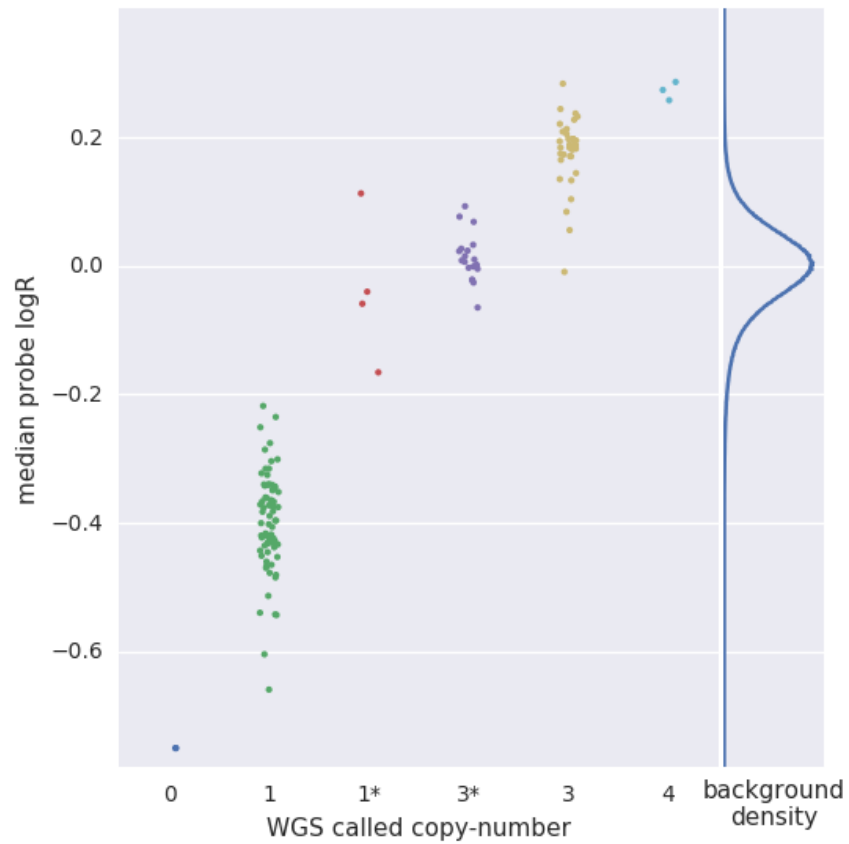

**Figure S1.** Inspection of Coriell GS CNVs in microarray data. Shown is median microarray probe depth for CNVs called in the GS-Canvas data processing pipeline across a cohort of 17 Coriell cell-lines. The background density on the right of the figure represents the distribution a four probe rolling median across the chip. \* indicates putative mosaic copy number states (1.5X-1.75X for deletions and 2.5X-2.75X for copy-number gains).

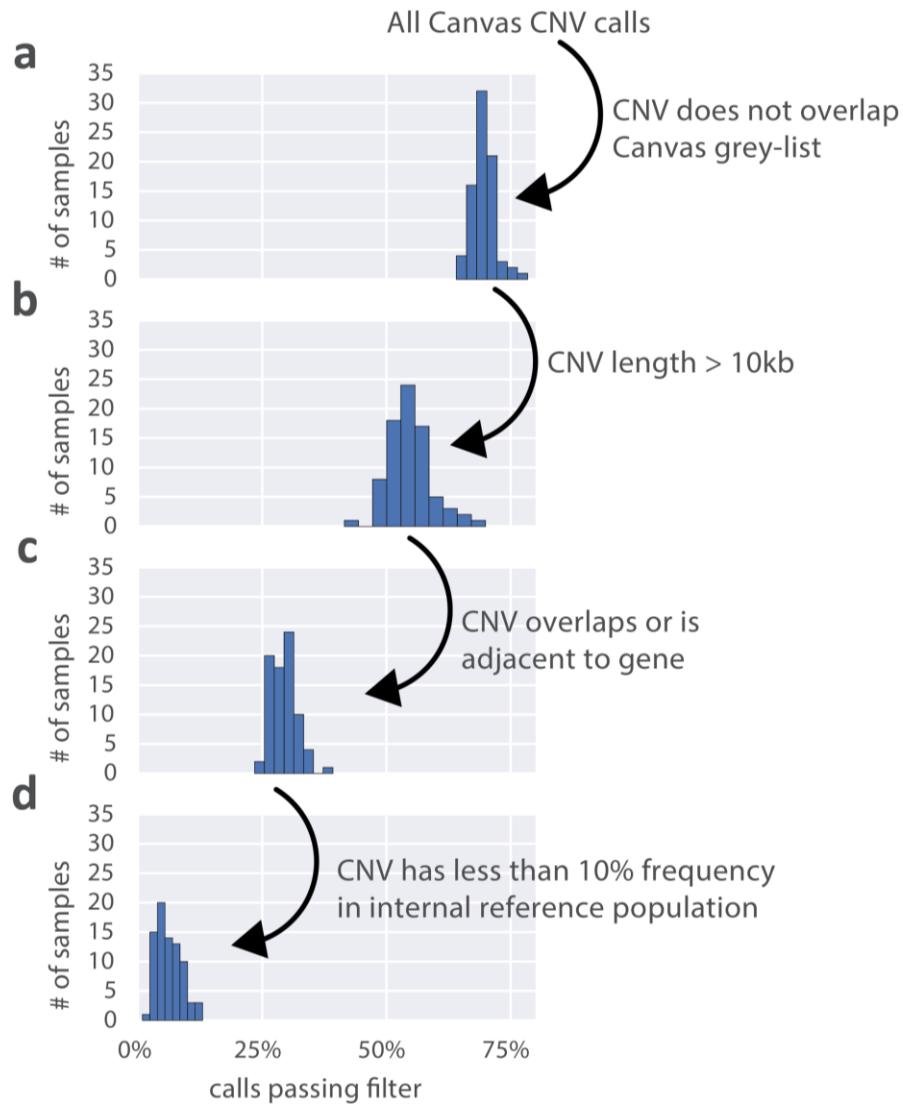

**Figure S2.** CNV filtering pipeline. During data processing, automated filters are applied to call-sets to limit the number of calls presented to case managers for manual curation. Shown in each panel are the percentage of calls remaining after each filtering step is applied sequentially. Distributions reflect 79 samples assessed for CNVs in the ICSL cohort. For details on individual filters, see **Methods**.

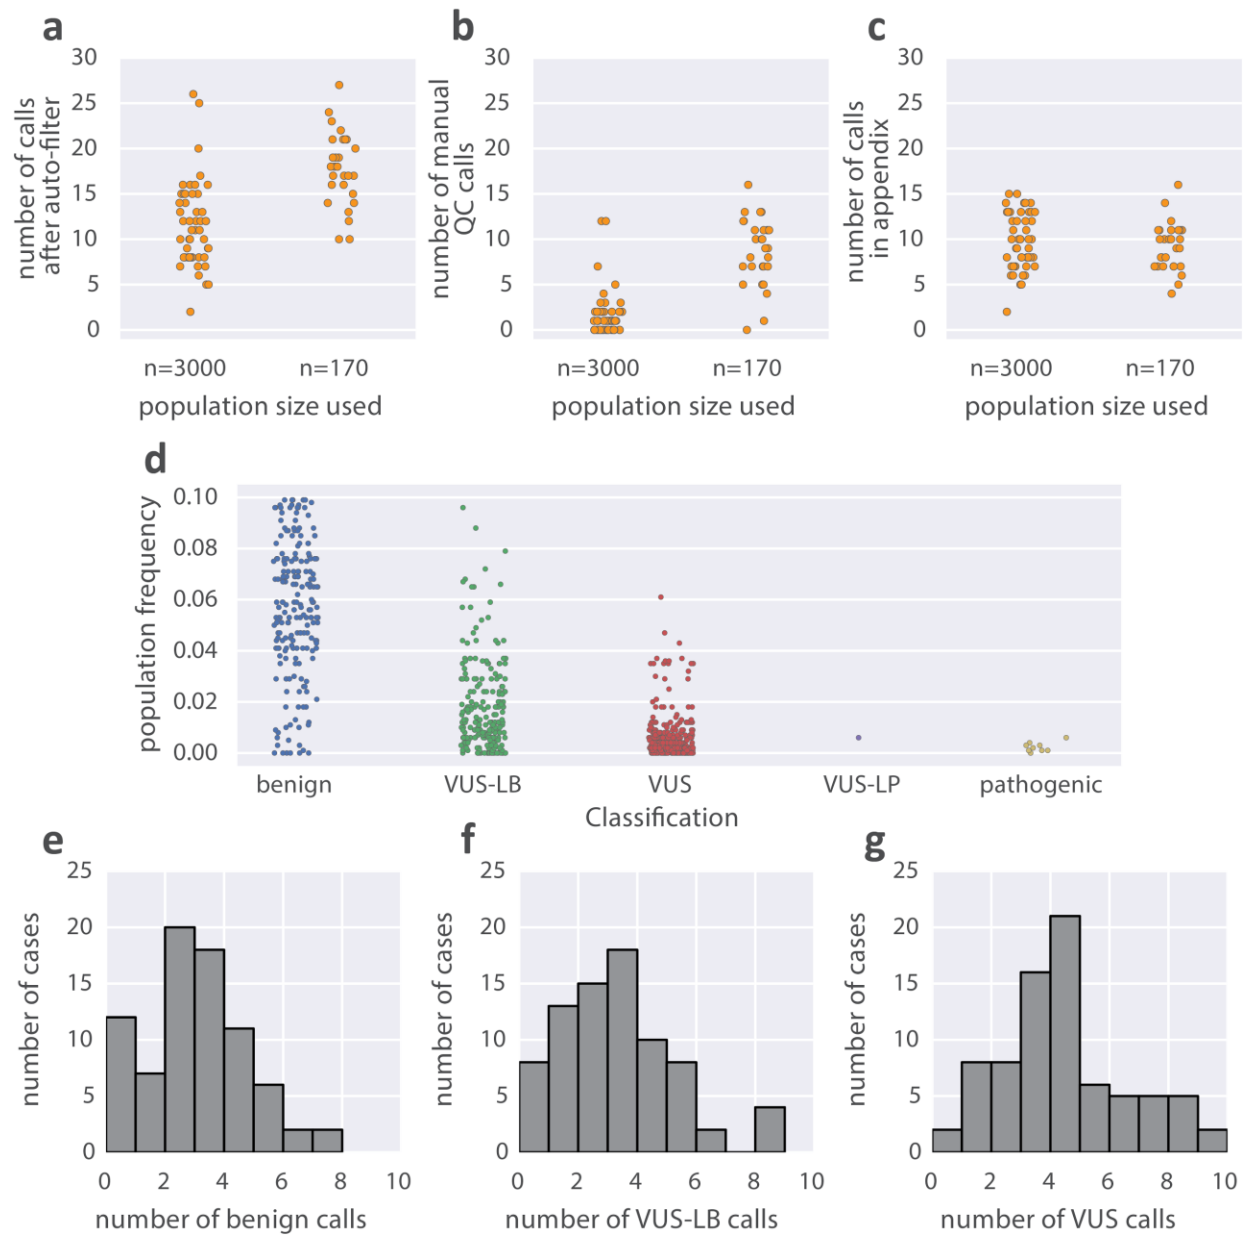

**Figure S3.** Summary of manual curation and variant annotation across the CNV clinical cohort. **(a-c)** Number of calls passing automated filters **(a)**, manually filtered **(b)** and included in a CNV appendix to clinical reports **(c)** broken down by the two populations used for CNV frequency annotation (n=170 was used for the first 28, and n=3000 was used for the remainder). **(d)** Copy number variant population frequency broken down by variant classification post curation. **(e-g)** Breakdown of variant classifications for CNVs included in clinical report appendix across the cohort. In addition there were calls reported as pathogenic in 7 cases, and one likely-pathogenic call reported. VUS - variant of unknown significance; VUS-LB- variant of unknown significance, likely benign.

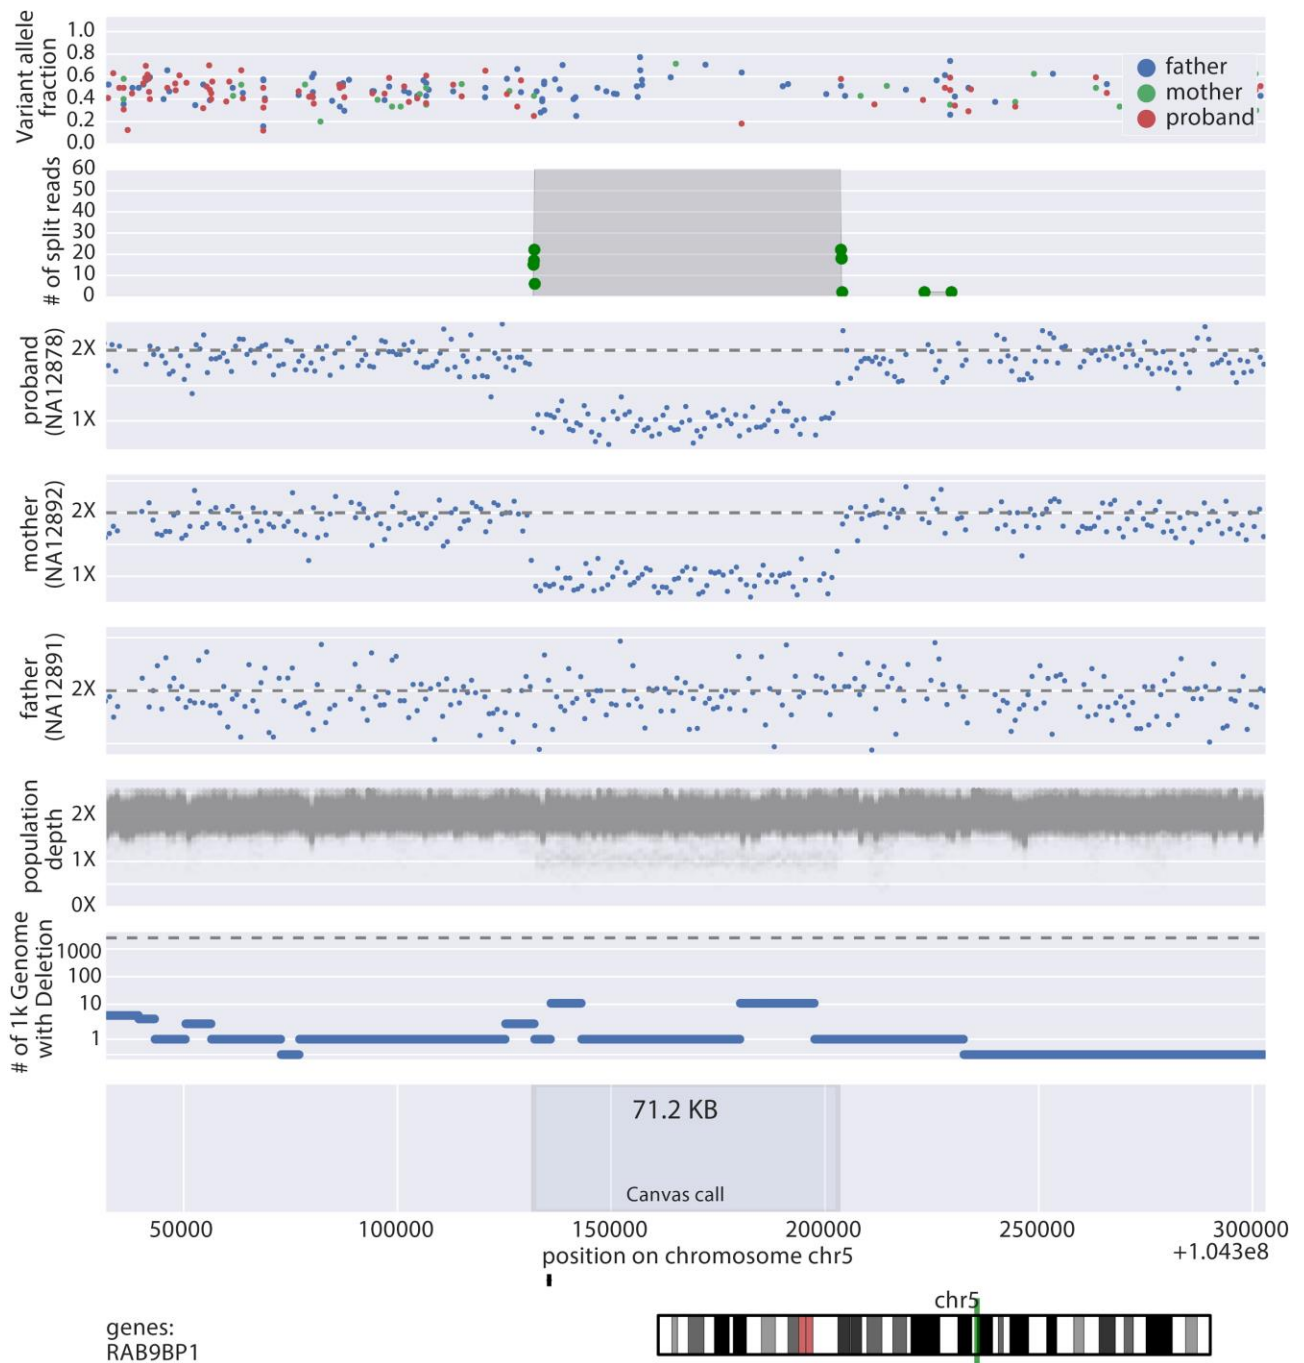

**Figure S4.** Example CNV visualization used for CNV interpretation. **Variant allele fraction:** read-count ratio of two alleles for all heterozygous SNVs in a region. This fraction should be centered at 1/2 in diploid regions, while for duplications it is expected to be centered around 1/3 and 2/3 as there is an imbalance of alleles. For deletions there should be an absence of heterozygous SNVs due to the presence of only one allele. **Number of Split Reads:** Green dots show the locations of discordant read-pairs, while the height of the grey shaded region indicates the number of discordant reads spanning across a given

region on the genome. Split read information may be used to increase confidence in a CNV call via signatures of deletion or tandem-duplication, but CNVs may have breakpoints in non-unique sequence resulting in an inability to uniquely map reads to the flanks of the CNV. **Read depth:** Normalized read depth across the proband and parents. This allows for evaluation of error modes and evaluation of putative mosaic CNVs. **1000 Genomes Data:** CNV calls the 1000 Genomes Project<sup>1</sup> (GS, 7x coverage) used to identify common deletions. **Population Depth Data:** Normalized coverage for 200 samples selected from our internal population data. This allows for inspection of population trends which may expose artifacts in the read-mapping or data-normalization process leading to a false-positive call. **Chromosome view and overlapping genes:** This field allows the interpreter to view where the event takes place in context of the chromosome and displays the coding sequences of genes that overlap the events so it can be determined if the genes are relevant to the phenotype.

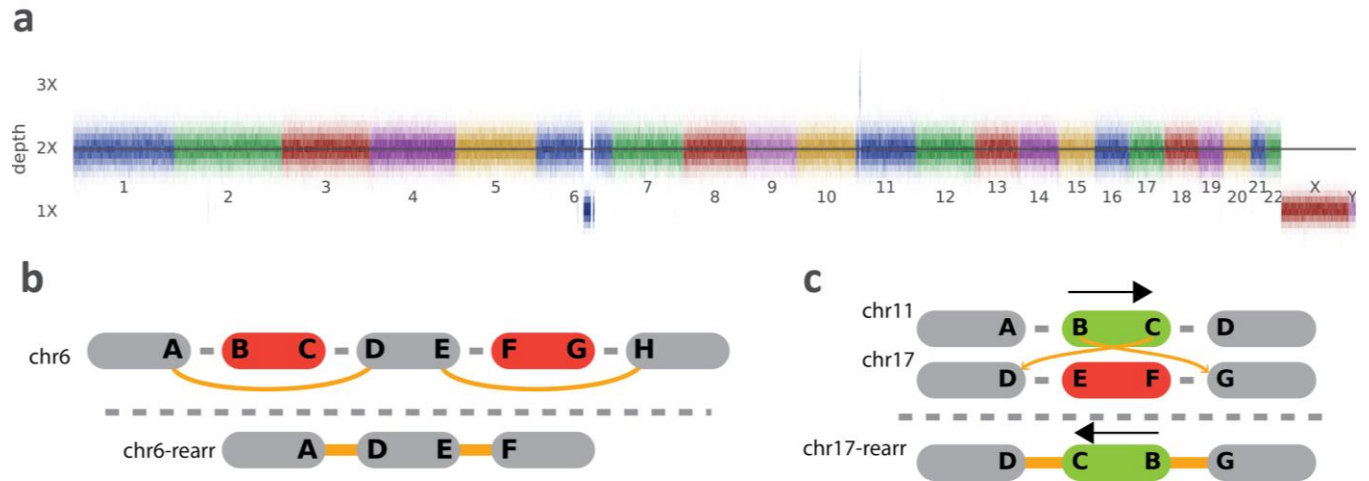

**Figure S5.** Complex rearrangement in subject P11. **a**, Depth across chromosomes showing two large regions of copy-number loss on chromosome 6 and a copy number gain on chromosome 11. **b**, Schematic of structural rearrangement on chromosome 6 indicating two large deletions in close proximity. **c**, Schematic of structural rearrangement on chromosome 17 indicated a large insertion of genetic material from chromosome 11.



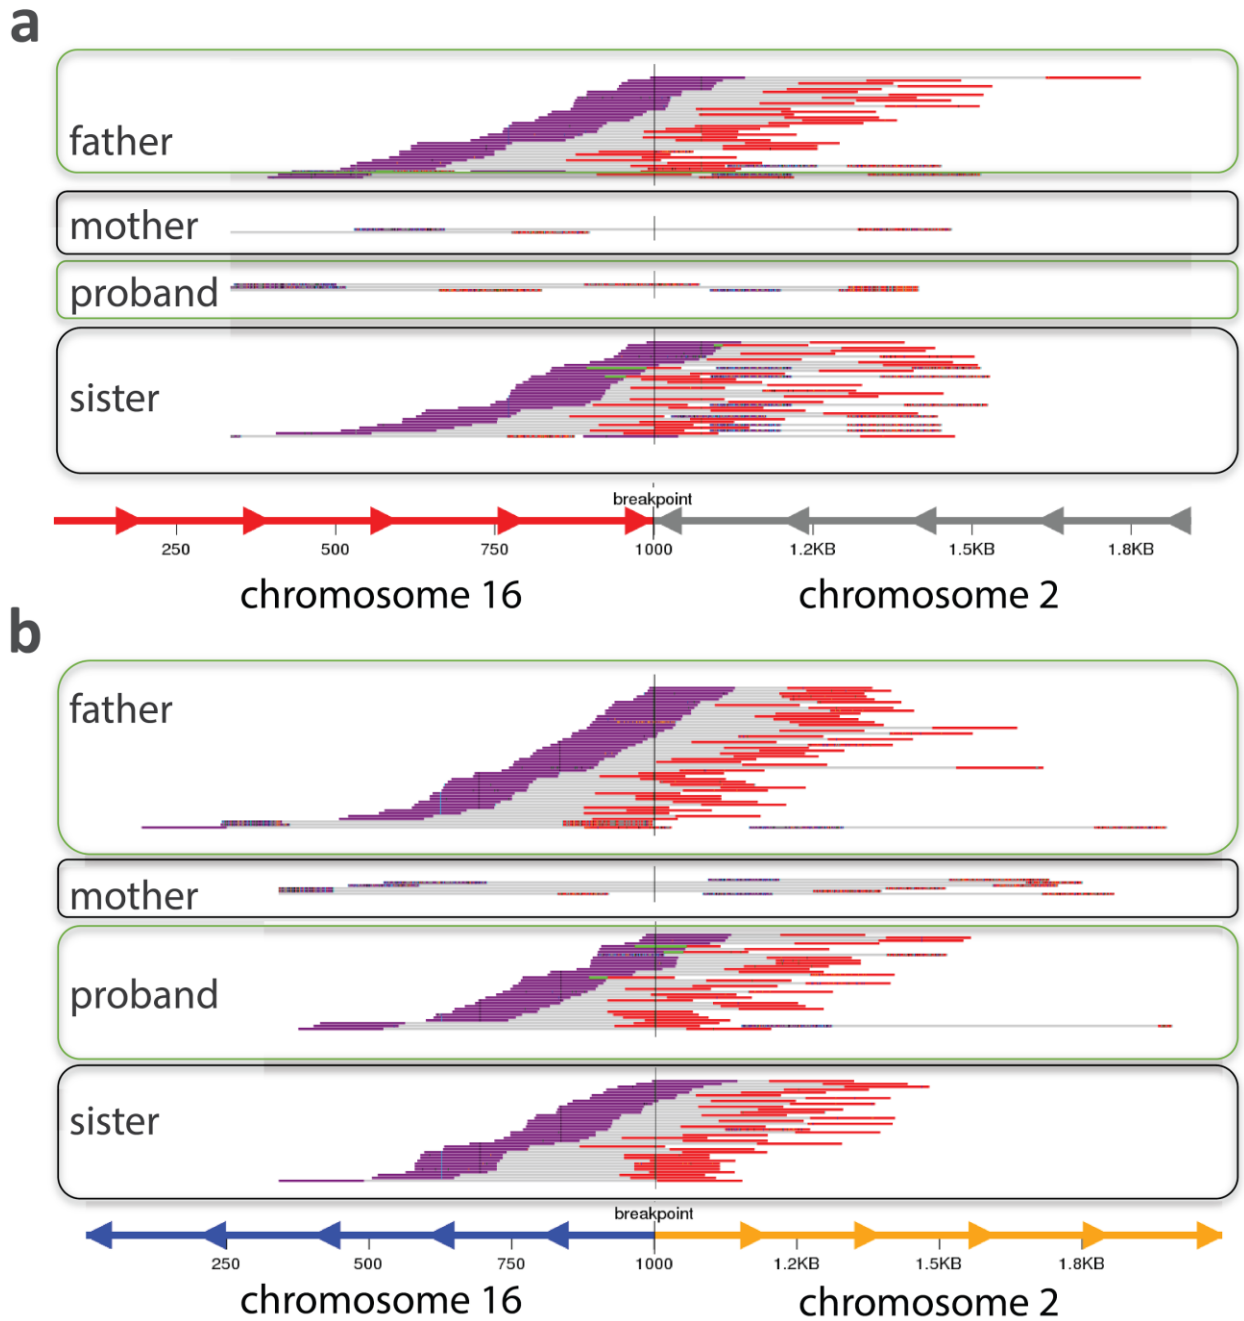

**Figure S6.** Read support for unbalanced translocation in subject P7. Shown here are modified plots from the svviz graph realignment program<sup>2</sup>. In brief, reads are realigned to normal (not shown) and recombinant (shown here) chromosomes across the pedigree. Purple and red colors represent the first and second reads in the read-pair, respectively, for details on the visualization and realignment methods see Spies et al.<sup>2</sup>. See also **Figure 2**.

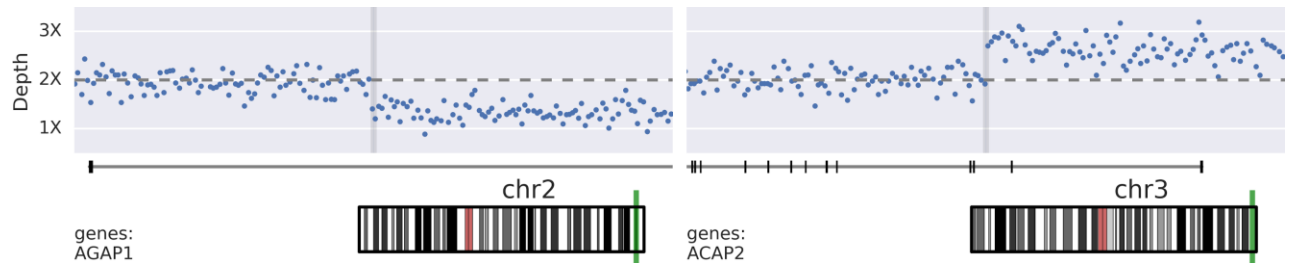

**Figure S7.** Depth at CNV breakpoints for a mosaic unbalanced translocation in subject P6. Horizontal grey lines correspond to the location of a non-homologous chromosomal break-end uncovered in structural variant analysis.

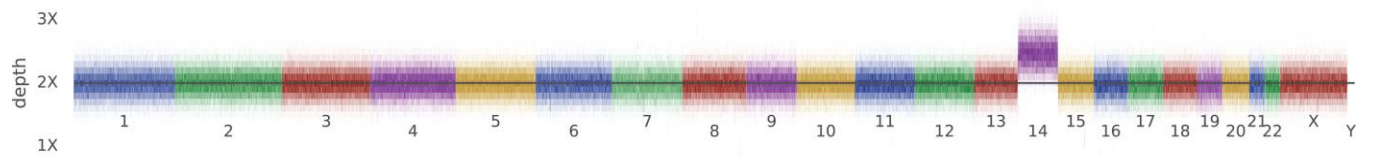

**Figure S8.** Depth across chromosomes for subject P6 with mosaic trisomy 14. Horizontal line corresponds to diploid copy-number.

# Supplemental Tables

**Table S1:** Coriell reference CNV call coordinates.

| subject | CHROM | start       | end         | gender | CN | event | size (kb) |
|---------|-------|-------------|-------------|--------|----|-------|-----------|
| NA02767 | chr21 | 0           | 48,129,895  | F      | 3  | GAIN  | 48,130    |
| NA04327 | chrX  | 32,827,464  | 32,850,164  | M      | 2  | GAIN  | 23        |
| NA04517 | chr14 | 88,399,358  | 88,429,855  | M      | 0  | LOSS  | 30        |
| NA04520 | chr16 | 2,097,990   | 2,114,272   | F      | 0  | LOSS  | 16        |
| NA05090 | chrX  | 32,843,154  | 32,897,248  | M      | 0  | LOSS  | 54        |
| NA06804 | chrX  | 133,607,389 | 133,620,495 | M      | 2  | GAIN  | 13        |
| NA06804 | chrX  | 133,594,369 | 133,607,388 | M      | 0  | LOSS  | 13        |
| NA09834 | chr19 | 50,576,403  | 50,681,994  | F      | 1  | LOSS  | 106       |
| NA09834 | chr15 | 89,456,759  | 91,764,988  | F      | 1  | LOSS  | 2,308     |
| NA09834 | chr9  | 111,554,622 | 111,768,395 | F      | 1  | LOSS  | 214       |
| NA09834 | chr9  | 97,860,095  | 99,648,422  | F      | 1  | LOSS  | 1,788     |
| NA11428 | chr3  | 162,626,559 | 197,896,005 | F      | 3  | GAIN  | 35,269    |
| NA11428 | chr3  | 162,513,136 | 162,625,983 | F      | 1  | LOSS  | 113       |
| NA11428 | chr3  | 60,332      | 5,368,902   | F      | 1  | LOSS  | 5,309     |
| NA11428 | chr3  | 132,724,911 | 162,513,080 | F      | 3  | GAIN  | 29,788    |
| NA12214 | chr17 | 14,153,961  | 15,544,134  | M      | 3  | GAIN  | 1,390     |
| NA13554 | chr15 | 25,165,212  | 25,205,204  | M      | 1  | LOSS  | 40        |
| NA13590 | chr17 | 25,984,092  | 26,085,108  | F      | 3  | GAIN  | 101       |
| NA13590 | chr2  | 97,886,321  | 131,157,859 | F      | 4  | GAIN  | 33,272    |
| NA13590 | chr2  | 242,915,453 | 243,034,674 | F      | 1  | LOSS  | 119       |
| NA13590 | chr4  | 144,842,091 | 144,943,597 | F      | 1  | LOSS  | 102       |
| NA13590 | chr9  | 33,140,788  | 33,261,061  | F      | 3  | GAIN  | 120       |
| NA18310 | chrX  | 0           | 155,270,560 | M      | 2  | GAIN  | 155,271   |
| NA20217 | chrX  | 798,388     | 998,748     | M      | 0  | LOSS  | 200       |
| NA20217 | chrX  | 585,079     | 620,146     | M      | 0  | LOSS  | 35        |
| NA20304 | chr15 | 32,458,660  | 32,876,972  | M      | 1  | LOSS  | 418       |
| NA20304 | chr15 | 20,500,000  | 22,500,000  | M      | 4  | GAIN  | 2,000     |
| NA21886 | chr1  | 237,231,289 | 237,441,153 | M      | 3  | GAIN  | 210       |

|         |       |             |             |   |   |      |        |
|---------|-------|-------------|-------------|---|---|------|--------|
| NA21886 | chr2  | 100,973,623 | 101,076,046 | M | 3 | GAIN | 102    |
| NA21886 | chr18 | 0           | 15,000,000  | M | 1 | LOSS | 15,000 |
| NA21886 | chr18 | 51,819,089  | 52,484,051  | M | 1 | LOSS | 665    |
| NA21886 | chr18 | 52,612,123  | 78,015,057  | M | 1 | LOSS | 25,403 |
| NA21886 | chr4  | 144,700,854 | 144,813,390 | M | 1 | LOSS | 113    |
| NA21886 | chr22 | 18,781,533  | 19,006,984  | M | 3 | GAIN | 225    |
| NA23127 | chrX  | 32,456,508  | 32,472,778  | M | 2 | GAIN | 16     |
| ND01037 | chr6  | 162,475,207 | 162,683,557 | M | 0 | LOSS | 208    |

**Table S2.** Sensitivity of cGS and clinical microarrays to annotated CNVs in cell-lines.

|                                                                                                                            |                    | <b>Coriell Events</b> | <b>Called by Array** (curated)</b> | <b>Called by cGS**</b> |
|----------------------------------------------------------------------------------------------------------------------------|--------------------|-----------------------|------------------------------------|------------------------|
| <b>event</b>                                                                                                               | <b>size</b>        |                       |                                    |                        |
| <b>LOSS</b>                                                                                                                | <b>10kb-50kb</b>   | 5                     | 3 (+1)                             | 4                      |
|                                                                                                                            | <b>50kb-100kb</b>  | 1                     | 1                                  | 1                      |
|                                                                                                                            | <b>100kb-500kb</b> | 9                     | 2 (+1)                             | 5                      |
|                                                                                                                            | <b>&gt;500kb</b>   | 6                     | 6                                  | 6                      |
|                                                                                                                            | <b>Overall</b>     | 21                    | 12 (57%)                           | 16 (76%)               |
| <b>GAIN</b>                                                                                                                | <b>10kb-50kb</b>   | 3                     | 0                                  | 2                      |
|                                                                                                                            | <b>100kb-500kb</b> | 5                     | 4                                  | 4                      |
|                                                                                                                            | <b>&gt;500kb</b>   | 7                     | 4                                  | 5                      |
|                                                                                                                            | <b>Overall</b>     | 15                    | 8 (53%)                            | 11 (73%)               |
| <b>All CNV calls</b>                                                                                                       |                    | n=36                  | 20 (56%)                           | 27 (75%)               |
| <p>**75% overlap<br/>           Note that +1 indicates calls that were not in call set, but recovered in manual review</p> |                    |                       |                                    |                        |

**Table S3.** Coordinates of reported variants from RUGD cases.

| ID  | event | chrom | CNV coordinates |           | SV coordinates |           | comment                                               |
|-----|-------|-------|-----------------|-----------|----------------|-----------|-------------------------------------------------------|
|     |       |       | start           | end       | start          | end       |                                                       |
| P1  | LOSS  | chrX  | 64104162        | 64158754  |                |           | split read evidence but no SV call                    |
| P2  | GAIN  | chr22 | 21052009        | 21484438  |                |           |                                                       |
| P3  | LOSS  | chrX  | 71549289        | 71557651  | 71549289       | 71557651  | CNV came from development SV pipeline                 |
| P4  | GAIN  | chr2  | 86283023        | 86511034  | 86282714       | 86510931  |                                                       |
| P5  | GAIN  | chr16 | 2882331         | 29047087  |                |           |                                                       |
| P6  | LOSS  | chr2  | 236478472       | 243048854 | 236478812      |           | breakpoint links CNVs in unbalanced translocation     |
| P6  | GAIN  | chr3  | 195106447       | 197846145 | 195105935      |           | breakpoint links CNVs in unbalanced translocation     |
| P7  | LOSS  | chr2  | 11314           | 3033976   |                | 3033857   | breakpoint links CNVs in unbalanced translocation     |
| P7  | GAIN  | chr16 | 82865402        | 90163542  | 82865480       |           | breakpoint links CNVs in unbalanced translocation     |
| P8  | LOSS  | chr19 | 35223021        | 36895699  | 35223614       | 36896374  |                                                       |
| P9  | GAIN  | chr18 | 11494           | 15404287  |                |           |                                                       |
| P10 | GAIN  | chr8  | 7153587         | 12245784  |                |           |                                                       |
| P11 | LOSS  | chr6  | 109324789       | 124836619 | 109325818      | 124836270 |                                                       |
| P11 | LOSS  | chr6  | 129969121       | 132499298 | 129970203      | 132499992 |                                                       |
| P11 | GAIN  | chr11 | 8548056         | 10497905  | 8548078        | 10498608  | region inserted into chr17                            |
| P11 | INS   | chr17 |                 |           | 41705963       | 41705972  | Genomic material from chr11 inserted here             |
| P12 | LOSS  | chr14 | 101261679       | 101288013 | 101261679      | 101288013 |                                                       |
| P13 | LOSS  | chr15 | 22696624        | 23301066  |                |           |                                                       |
| P14 | LOSS  | chr16 | 14800000        | 16400000  |                |           | approximate boundaries due to low sequence complexity |
| P15 | LOSS  | chr7  | 6027017         | 6776186   |                |           |                                                       |
| P16 | GAIN  | chr21 | 14596056        | 48101324  |                |           |                                                       |
| P17 | GAIN  | chr14 |                 |           |                |           | CNV ID by visualization, boundaries manually assessed |
| P18 | ROH   | chr15 | 23633319        | 102280298 |                |           | boundaries assessed by ROH caller                     |
| P19 | ROH   | chr16 | 80212           | 90142842  |                |           | boundaries assessed by ROH caller                     |

# Supplemental Note

## Manual Inspection of NA12878 calls with partial PacBio/BioNano overlap

In these cases, calls from our GS call-set had partial overlap with the PacBio/BioNano derived calls. We inspected these manually to better understand the discrepancies and assess false-positive or true-positive status.

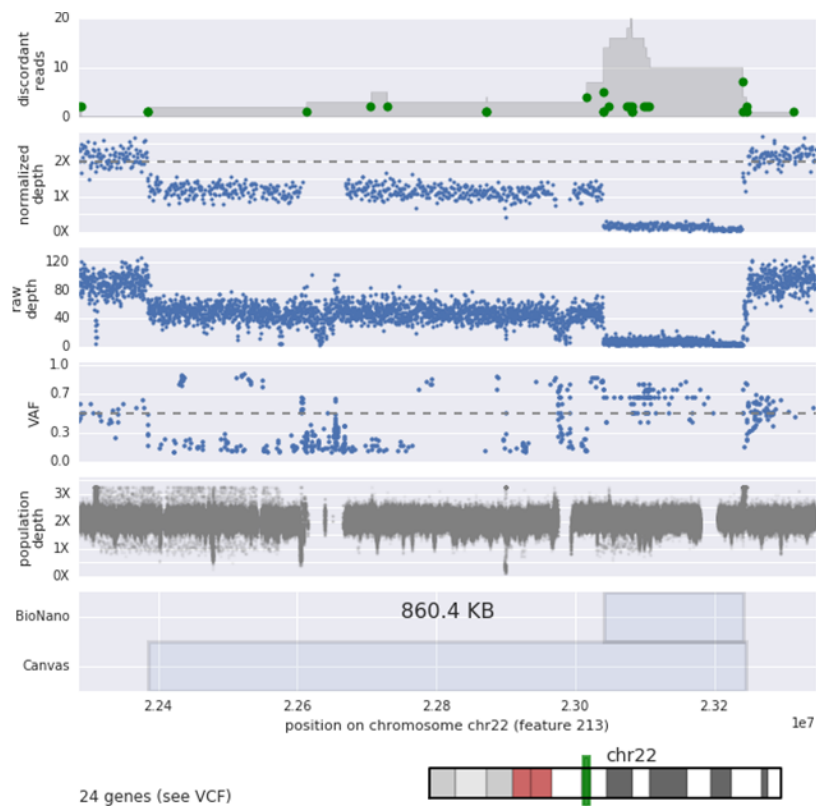

**Supplemental Note Figure 1.** This is a homozygous deletion flanking a mosaic 22q11 deletion, a likely cell line artifact. Our GS pipeline called this event as a single CNV, whereas the PacBio/BioNano based call-set only contained the homozygous deletion.



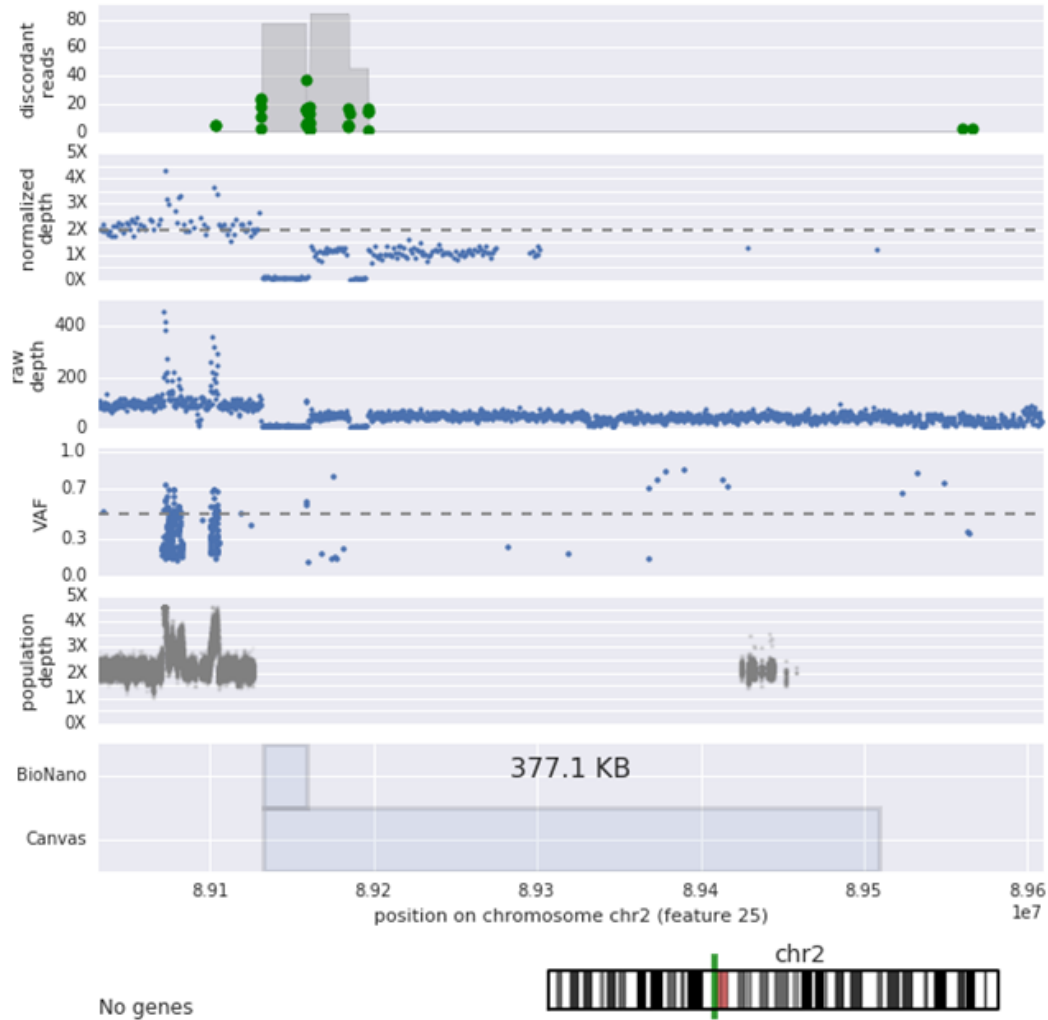

**Supplemental Note Figure 2:** This CNV is a homozygous deletion followed by a mosaic loss leading up to the centromere of chromosome 2. The homozygous deletion is contained in the PacBio/BioNano callset, but the mosaic loss is missed or filtered.

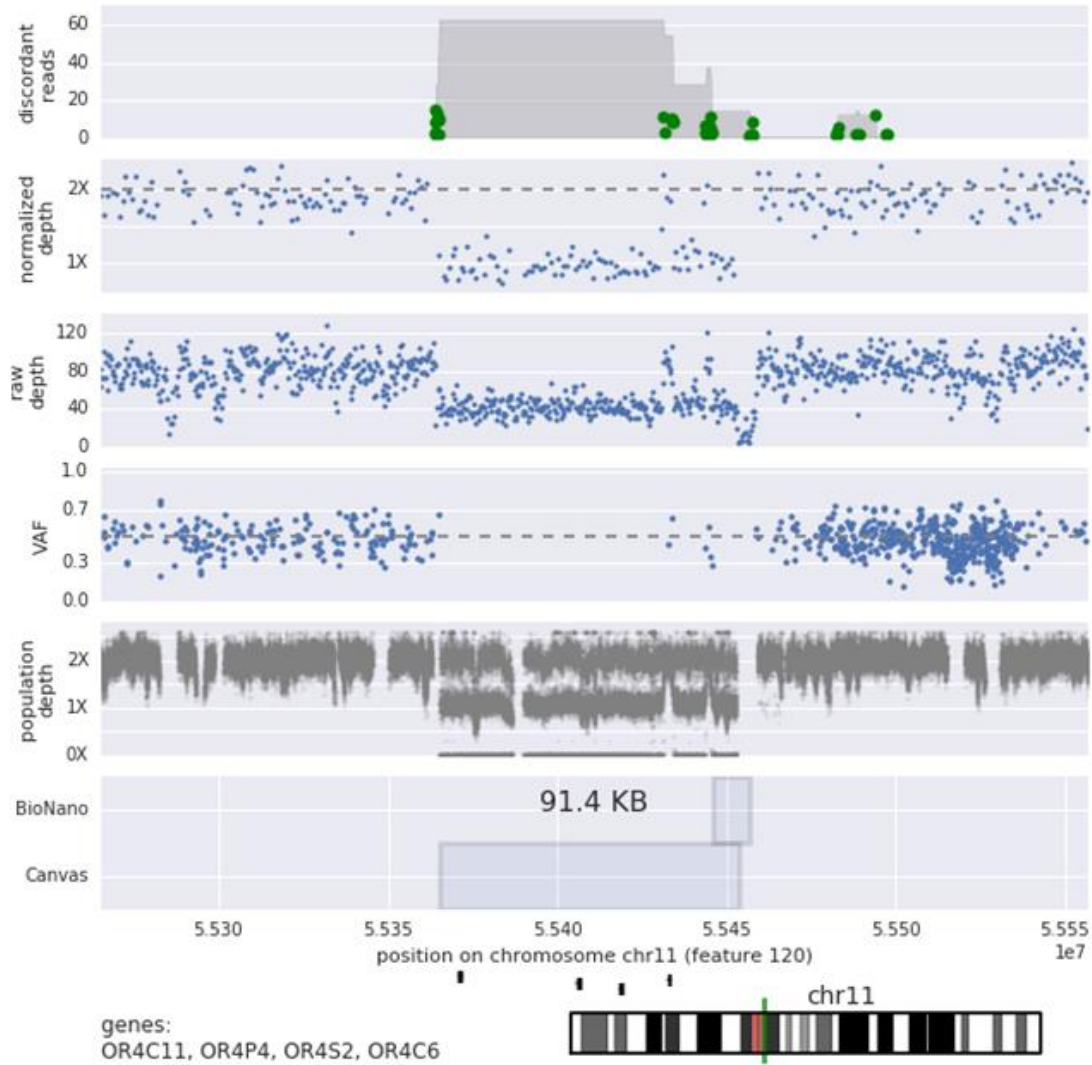

**Supplemental Note Figure 3:** This is a very common deletion supported by both population data, as well as discordant sequencing reads. The PacBio/BioNano call-set only partially called this deletion, but the data strongly support the GS depth based call. We suspect that this was missed by the alternative technologies due to the presence of more complex structural rearrangement in the region.

## Manual Inspection of Coriell CNV Calls

We conducted an investigation of false negative (FN) calls to determine if any systematic issues could be identified. To search for error modes, FN calls were analyzed via manual inspection of microarray depth, sequencing depth, and discordant reads. We found nearly all of the discrepant calls occurred in low complexity regions not covered by microarray, or had ambiguous annotation on the Coriell website and/or copy number calling publication<sup>3</sup>. Although we cannot definitively conclude that certain calls from Coriell are erroneous, data from NGS and multiple genotyping arrays do not support a majority of these calls. To this effect, while the initial recall was calculated at 86% (31/36) events, this in-depth view of data leads us to speculate that the sensitivity is considerably higher.

### Manual Inspection of Coriell CNV Calls

Prior to validation, a 75% reciprocal overlap threshold was set for calling of concordant calls. In **Table 1** we note 4 CNV calls with reciprocal overlaps in the range of 50-75%. A post-hoc analysis of this data generally support the boundaries of the Canvas CNV. The Coriell provided coordinates for all four CNVs are provided in Table S1.

NA02767: trisomy 21. The Coriell website records the CNV as extending across the centromere, whereas canvas calls the trisomy as the entirety of 21q, resulting in a 70% overlap. We note that we cannot call CNVs into the 21p due to low sequence complexity.

NA06804: HPRT1 duplication. The Coriell website reports a qualitative description of exon 2 and 3 duplication. The Canvas call is shifted from the truth-set coordinates by 3kb, but is well supported by both the read depth, as well as discordant read data. See **Supplemental Note Figure 4**.

NA20304: 15q GAIN. This CNV is a common GAIN of genetic material near the centromere of chromosome 15. Canvas split this into two separate calls with a large gap in the middle due to low complexity sequence as shown in **Supplemental Note Figure 5**.

ND01037: PARK2 exon 4 deletion. Inspection of sequencing depth data clearly supports the GS based coordinates for this homozygous deletion. See **Supplemental Note Figure 6**.

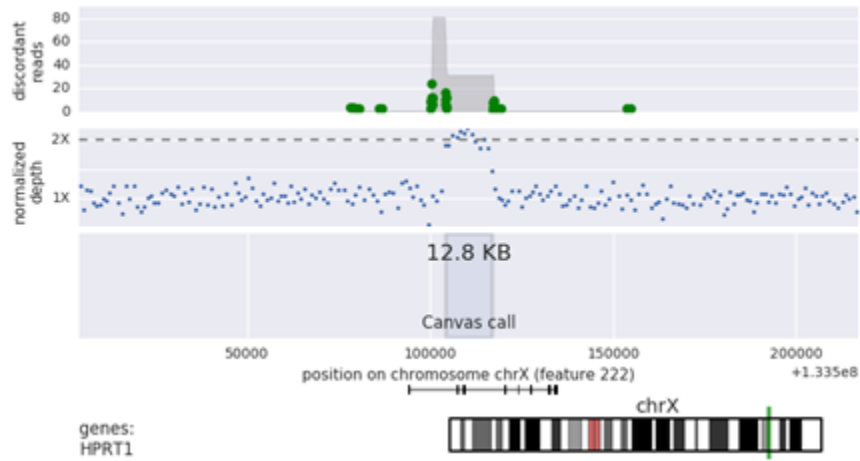

**Supplemental Note Figure 4:** Depth and discordant read locations in Coriell sample NA06804 near the HPRT1 locus.

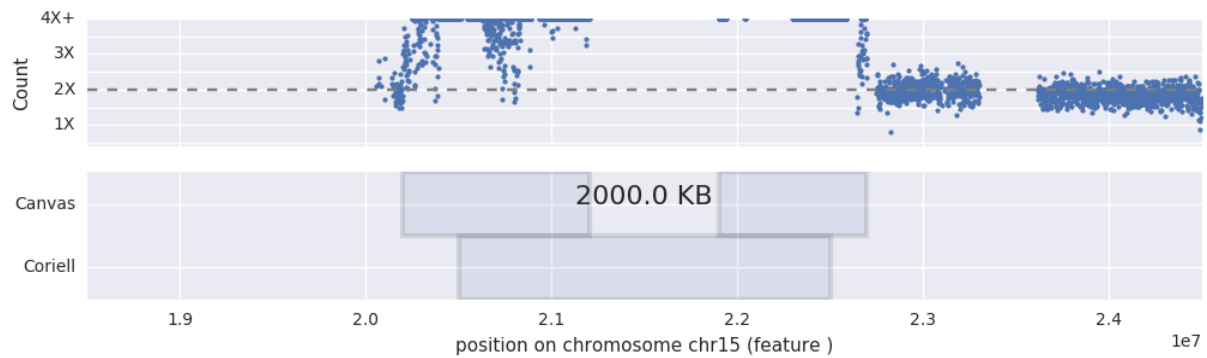

**Supplemental Note Figure 5:** Depth in Coriell sample NA20304 near the centromere on 15q.

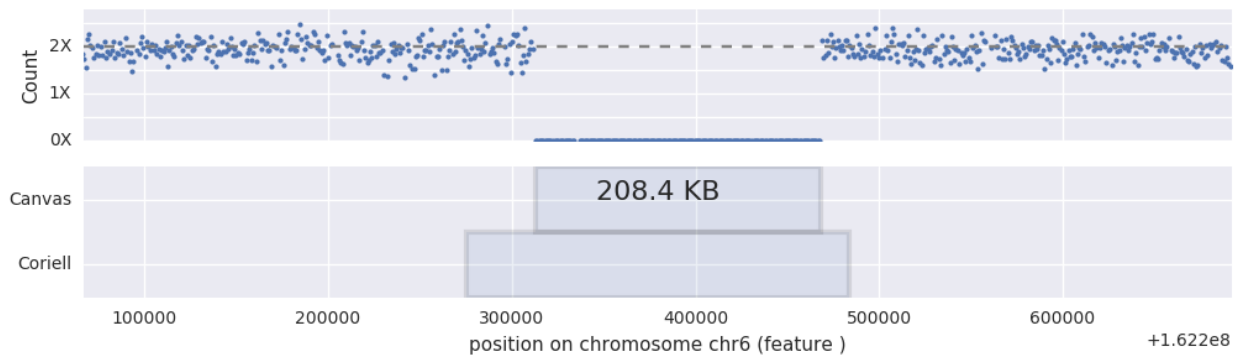

**Supplemental Note Figure 6:** Depth in Coriell sample ND01037 near the PARK2 exon 4 deletion.

## Manual Inspection of Calls with Less Than 75% Reciprocal Overlap

For assessment of reference call recovery, we chose a one-sided overlap to assess the fraction of a given reference call recovered. This was due to many of the reference CNVs in Coriell being reported by exon- or probe-based measurements and/or compatibility issues between reference assemblies resulting in imprecise CNV boundaries. In addition, a bi-directional metric is complicated by the presence of reference call CNVs being represented by multiple CNVs from our calling pipeline. This is unavoidable for larger CNVs as benign variation often breaks up large CNVs into multiple calls: for example for the case of trisomy 21, there were multiple benign deletions causing a deviation from copy number 3 within much smaller regions.

During our validation, calls were manually curated to check for the type of edge cases where a large artefactual CNVs, may spuriously validate a reference call. To formally assess this, CNVs overlapping reference set calls were assessed for the fraction of the call overlapping the reference call. Nine calls with less 75% overlap were curated, and are represented below. It can be seen that these are clearly supported by the sequencing depth data and unlikely to be artifacts. See **Supplemental Note Figures 5 and 7-14**.

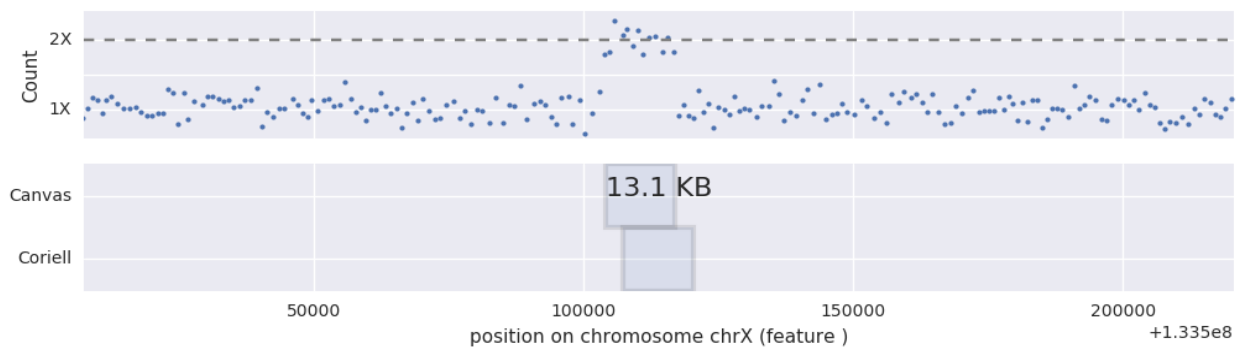

**Supplemental Note Figure 7:** Depth in Coriell sample NA06804.

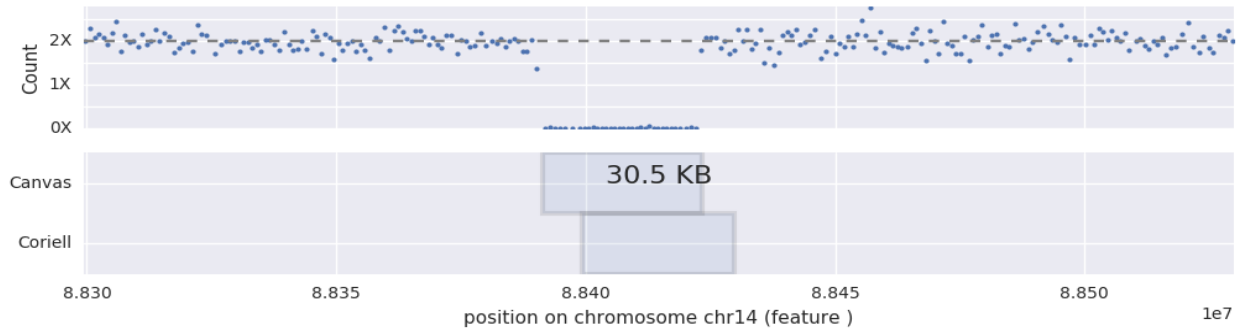

**Supplemental Note Figure 8:** Depth in Coriell sample NA04517.

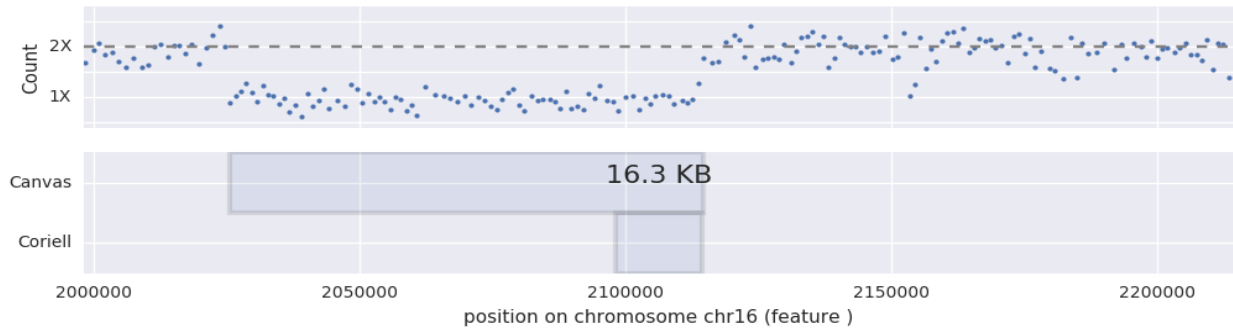

**Supplemental Note Figure 9:** Depth in Coriell sample NA04520.

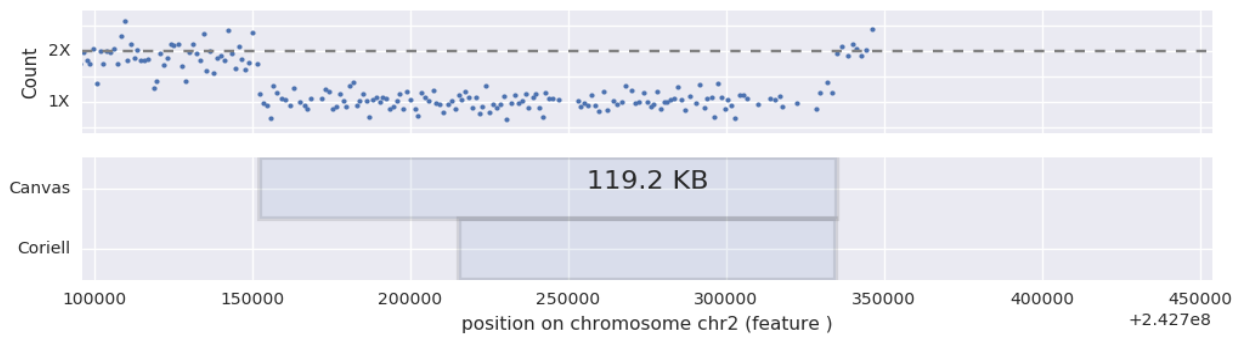

**Supplemental Note Figure 10:** Depth in Coriell sample NA13590.

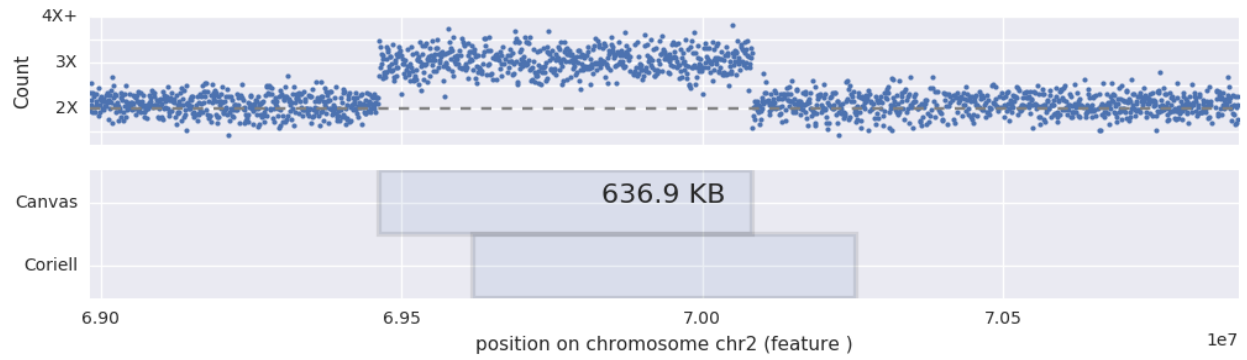

**Supplemental Note Figure 11:** Depth in Coriell sample NA16451.

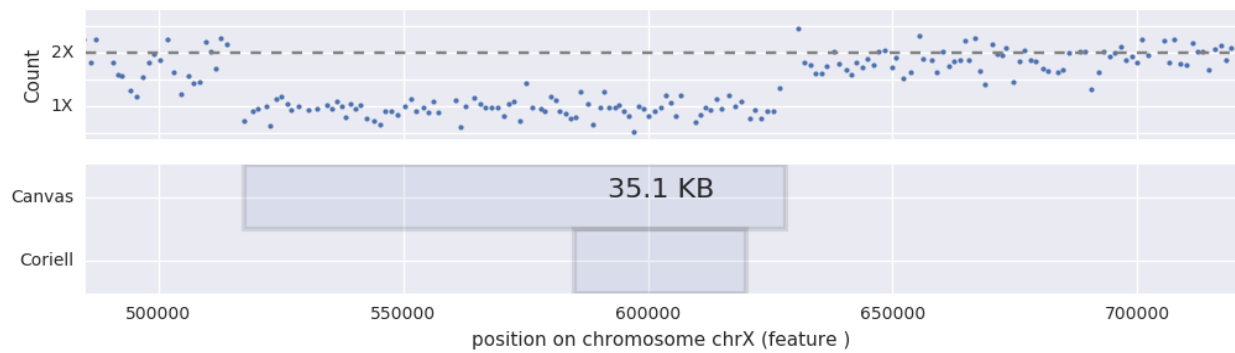

**Supplemental Note Figure 12:** Depth in Coriell sample NA20217.

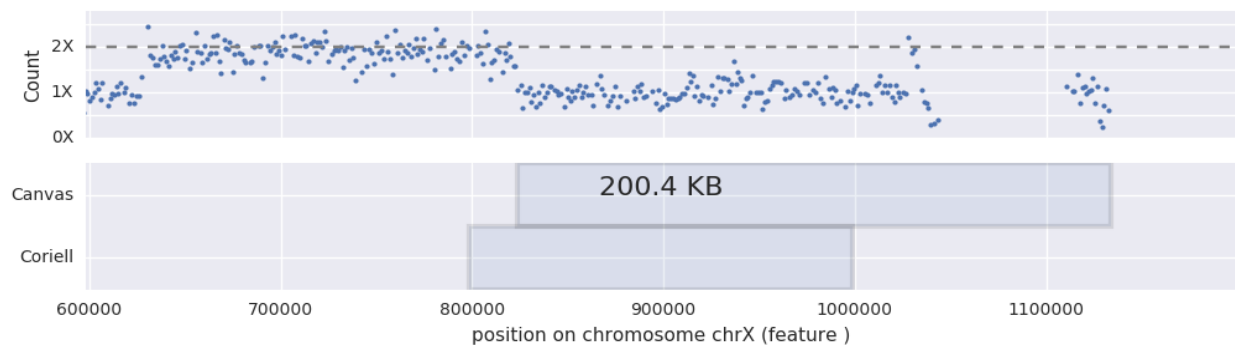

**Supplemental Note Figure 13:** Depth in Coriell sample NA20217.

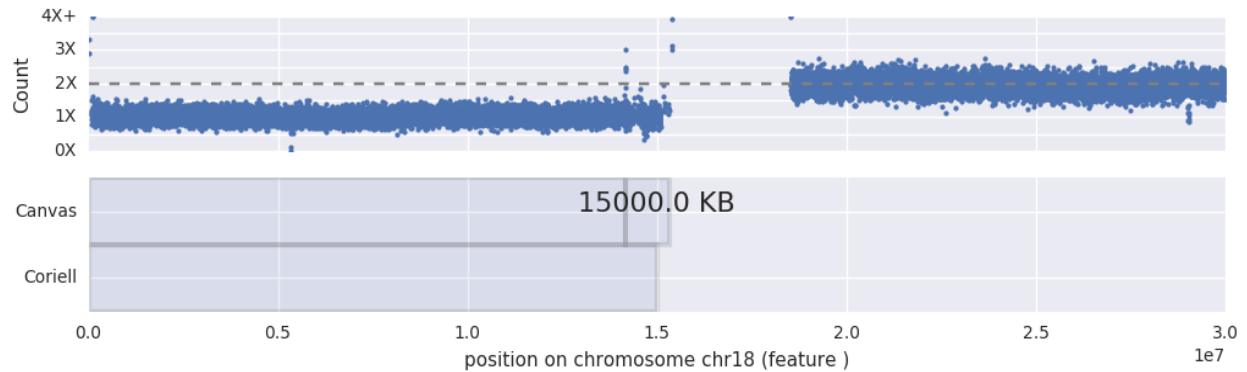

**Supplemental Note Figure 14:** Depth in Coriell sample NA21886. NA21886: This CNV is a loss of 18p and was split into two calls by our CNV Caller. The smaller call extends past the boundary of the reference call, but qualitatively it is clear that the correct call should extend to the centromere.

### Manual Inspection of False Negative Coriell CNV Calls

Independent investigation of false negative (FN) calls was performed to determine if any systematic issues could be identified (**Supplemental Note Table 1**). To search for error modes, FN calls were analyzed via manual inspection of microarray depth, sequencing depth, and discordant reads.

**Supplemental Note Table 1:** Investigation of false negative Coriell CNV calls.

| Coriell Call | Subject | CHROM | Size | Coriell CN | Array evidence | Manual inspection evidence | Suspected reason for FP           |
|--------------|---------|-------|------|------------|----------------|----------------------------|-----------------------------------|
| 6            | NA06804 | chrX  | 13   | 0          | No             | No                         | Misinterpretation of primary data |
| 7            | NA09834 | chr19 | 105  | 1          | No             | No                         | Poor mapping or array artifact    |
| 30           | NA20304 | chr15 | 418  | 1          | No             | No                         | Poor mapping or array artifact    |
| 33           | NA21886 | chr2  | 102  | 3          | No             | No                         | Bad annotation in Coriell         |
| 37           | NA21886 | chr4  | 112  | 1          | No             | No                         | Bad annotation in Coriell         |



One false negative from the Coriell call-set call occurred in the NA6804 sample on the first intron of the HPRT1 gene. Re-inspection of the literature supporting this event showed conflicting reports of this pathogenic rearrangement. Yang et al.<sup>4,5</sup> report a duplication of exons 2 and 3 of the gene alongside a deletion of exon 1. In contrast Monnat et al.<sup>6</sup> showed that the gain in exons 2/3 results from an insertion of the sequence into the first intron of HPRT1. While Canvas correctly identified the reported duplication, the read depth and paired read data seem to support the latter report of an insertion of this sequence into the first intron (**Supplemental Note Figure 4**). Based off of this evidence as well as Monnet et al., it is likely that the reported deletion is actually an artifact of the experimental methodology of Yang et al. as opposed to a true CNV.

The remaining four discrepancies indicate that the Coriell calls could be the results of artifacts in the experimental or bioinformatic analysis of these cell lines, or could be events originating at the cell line level that have diverged between different cell line specimens. Among the two discordant CNVs in NA21886, there is good coverage of GS sequencing data and array probes but not evidence of a CNV (**Supplemental Note Figure 15**). In contrast, the CNVs on NA09834 and NA20304 are likely mapping or array artifacts. Take for example the 418kb deletion on chromosome 15 in NA20304 (**Supplemental Note Figure 16**). This CNV is reported in hg18 coordinates, and in our arrays it seems as though there are few probes within the region. Looking at the mappability (UCSC track ‘Duke unique 35mers’) between hg18 and hg19 in this region, it becomes clear that the updated reference has the sequence of this region represented multiple times as the ‘uniqueness’ drops from ~1 to ~.5 in most of the region (**Supplemental Note Figure 16**). Thus we can conclude that in hg18, this is likely a copy-number 4 region in the reference and any copy-number variants would represent this collapsed representation. Taken together we hypothesize that this CNV could be an artifact of the Affymetrix array from which it was derived, but have insufficient evidence to definitively rule this call out as a false negative.

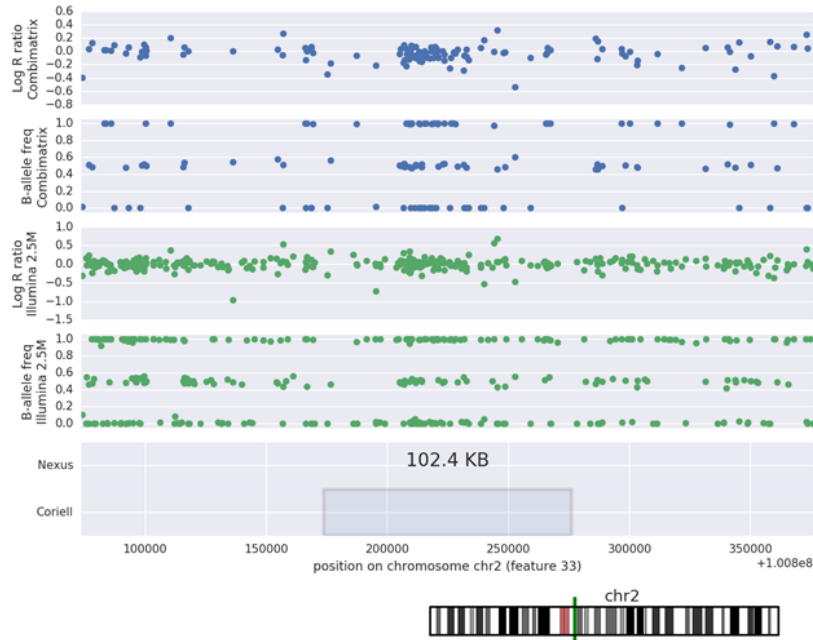

**Supplemental Note Figure 15:** Example of CNV annotated in the Coriell sample NA21886 that has little to no support from two commonly used clinical microarrays.

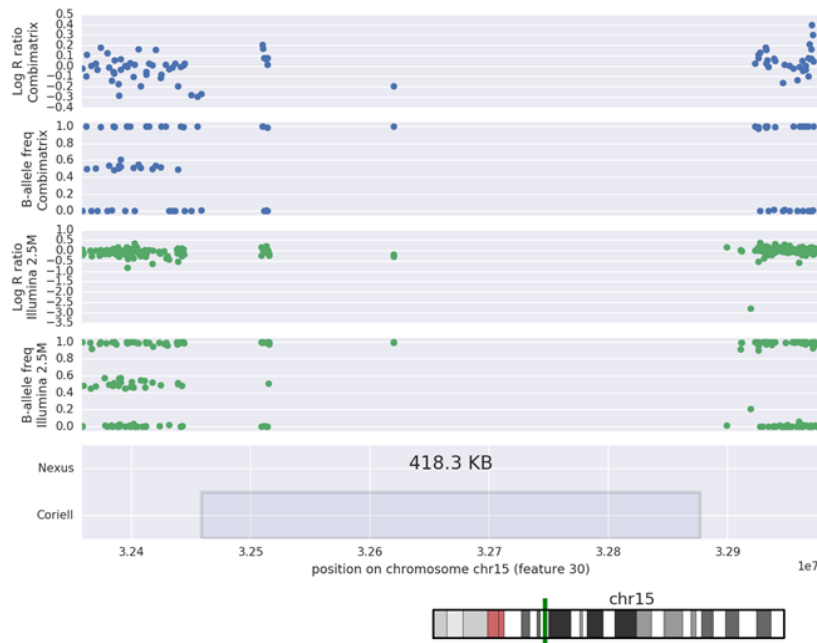

**Supplemental Note Figure 16:** Example of CNV annotated in the Coriell sample NA20304 that has little to no support from two commonly used clinical microarrays.

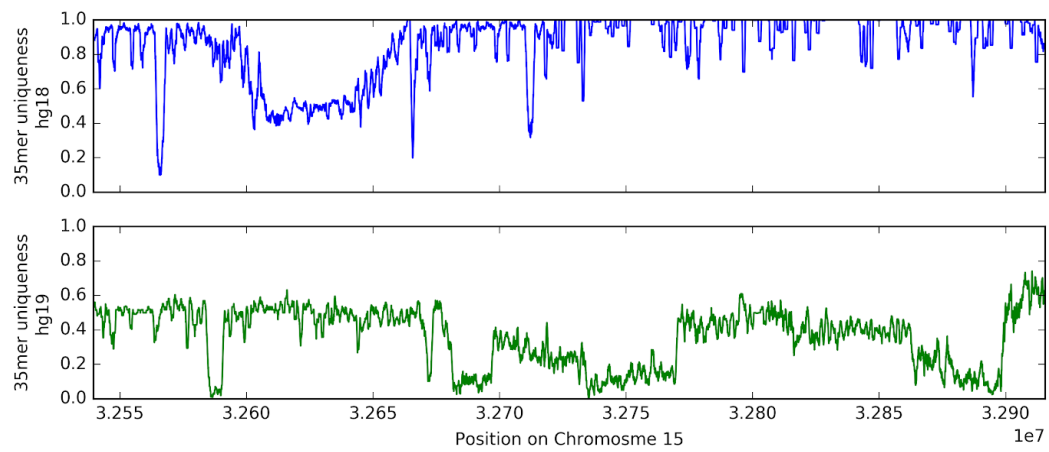

**Supplemental Note Figure 17:** Uniqueness of reference genome sequence across hg18 and hg19 reference assemblies. Plotted here is a 1000bp rolling window.

## Microarray confirmation of CNVs

All sequenced clinical samples were run in parallel with Illumina Infinium Omni 2.5 genotyping chips. Array-based CNV analysis was conducted post-hoc on all samples with a positive CNV result that was not validated externally. Samples were processed in a single batch through GenomeStudio, and median centered across the cohort. All listed p-values are assessed via a permutation of the probe logR values for a given sample for all autosomes except for that on which the CNV resides. Note that the CNVs reported in subjects P6 and P7 were confirmed by an external clinical microarray lab, and the P16 was confirmed via karyotype.

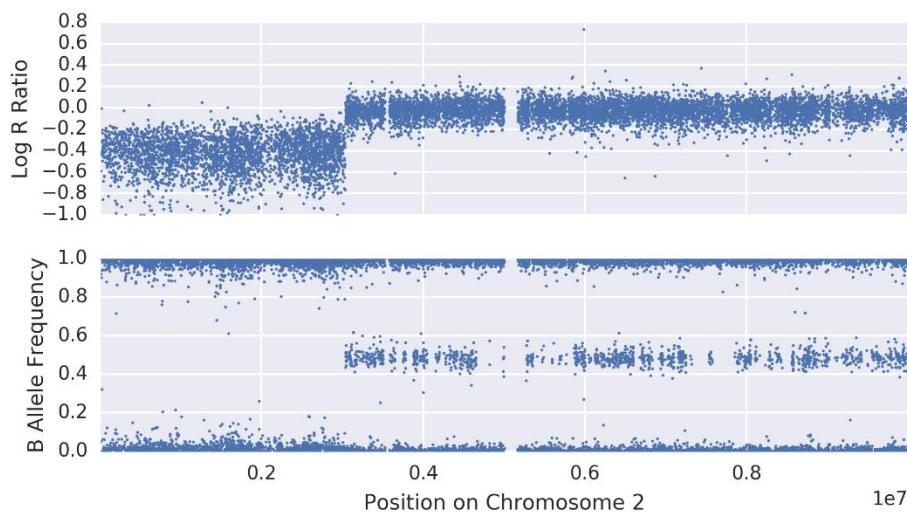

**Supplemental Note Figure 18:** Subject P7. chr2: 11314- 3033976. Empirical  $P < 10^{-10}$ .

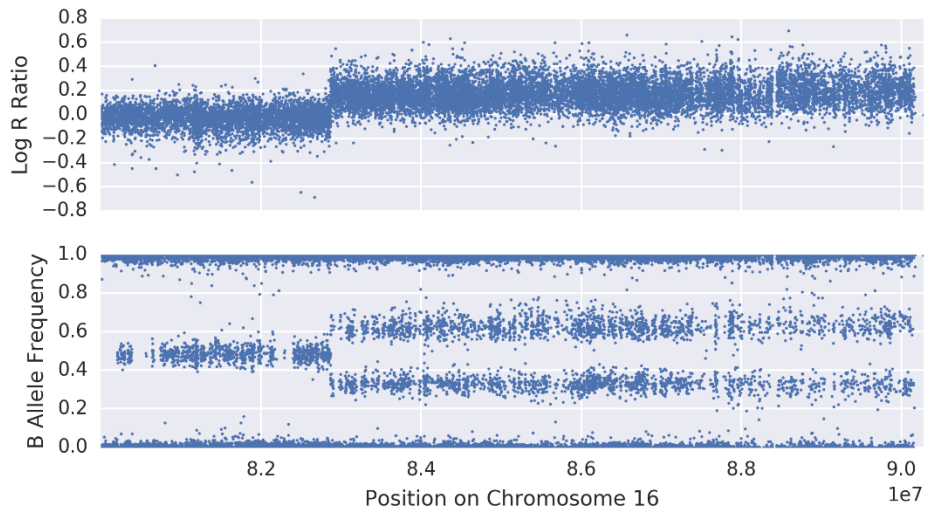

**Supplemental Note Figure 19:** Subject P7. chr16: 82865402- 90163542. Empirical  $P < 10^{-10}$ .

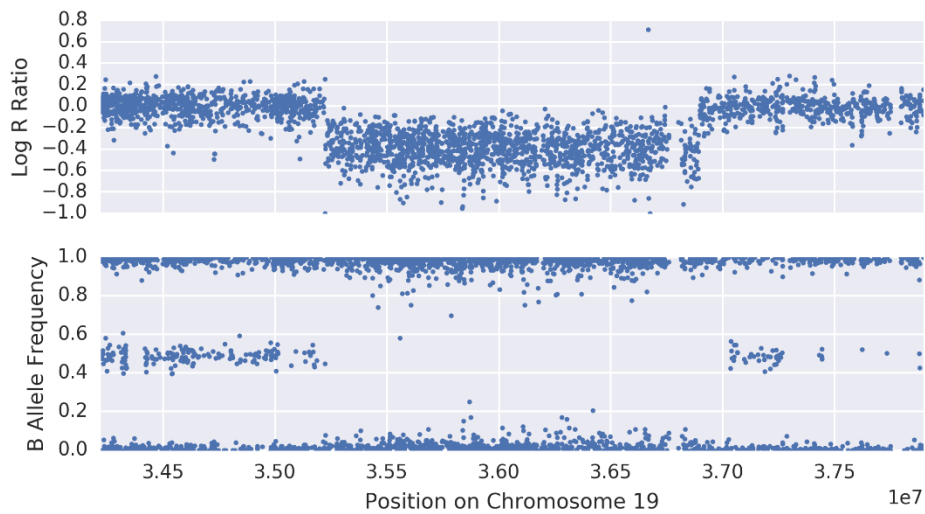

**Supplemental Note Figure 20:** Subject P8. chr19: 35223021- 36895699. Empirical  $P < 10^{-10}$ .

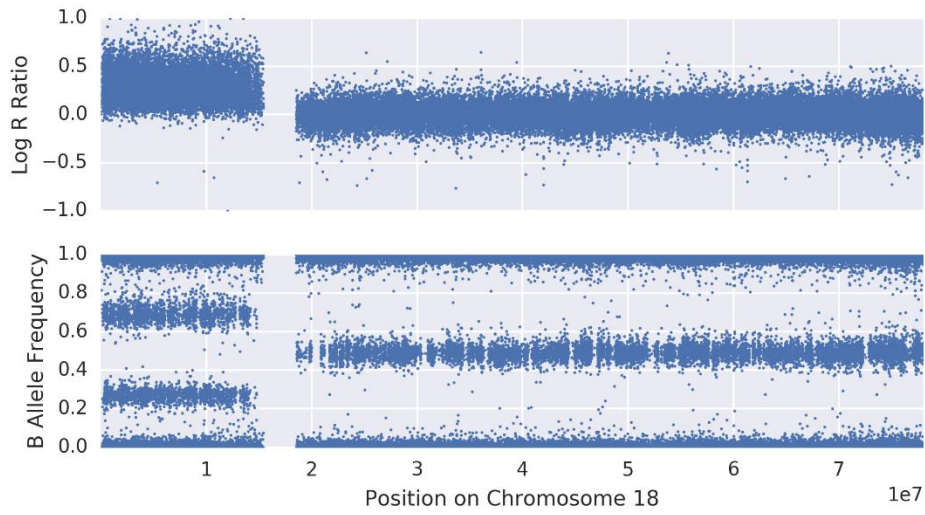

**Supplemental Note Figure 21:** Subject P9. chr18: 11494- 15404287. Empirical  $P < 10^{-10}$ .

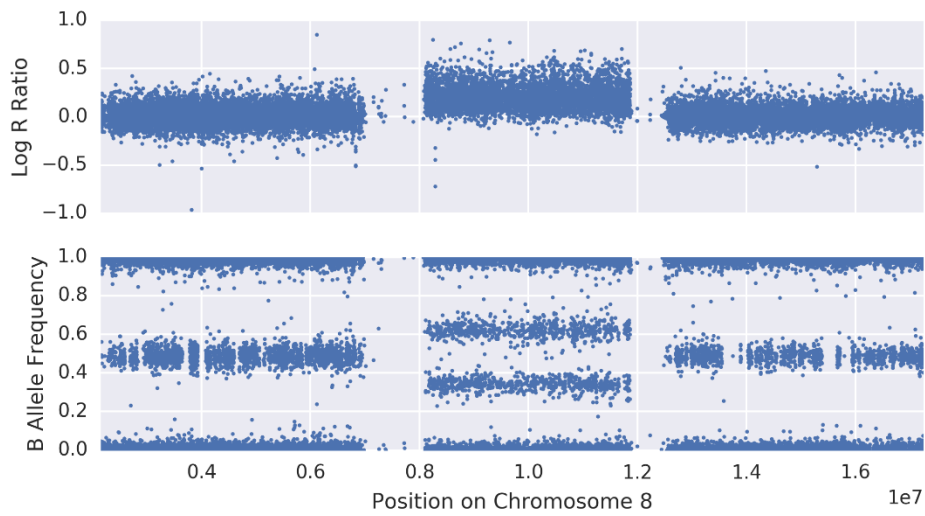

**Supplemental Note Figure 22:** Subject P10. chr8: 7153587- 12245784. Empirical  $P < 10^{-10}$ .

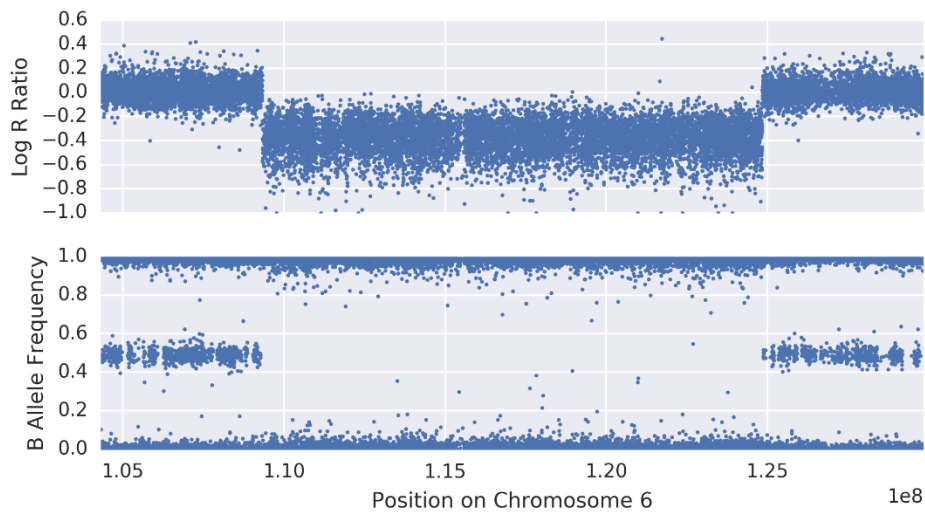

**Supplemental Note Figure 23:** Subject P11. chr6: 109324789- 124836619. Empirical  $P < 10^{-10}$ .

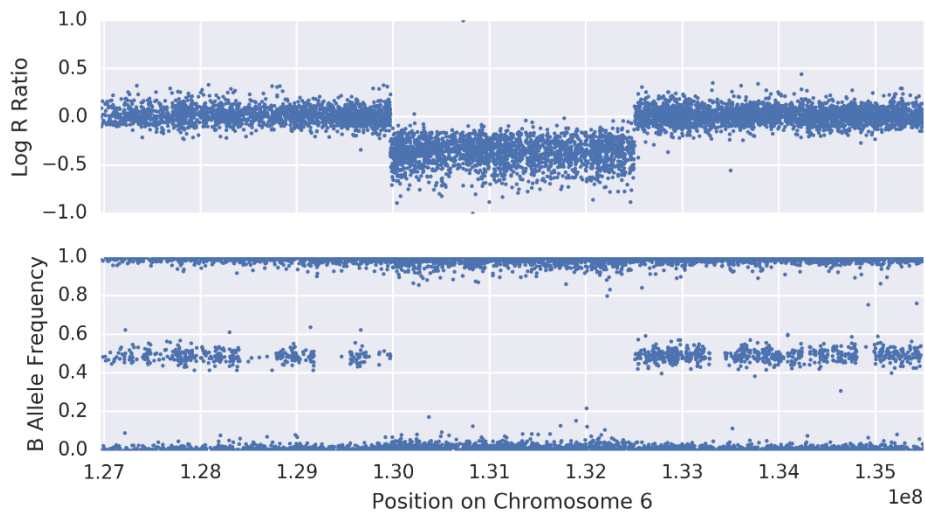

**Supplemental Note Figure 24:** Subject P11. chr6: 129969121- 132499298. Empirical  $P < 10^{-10}$ .

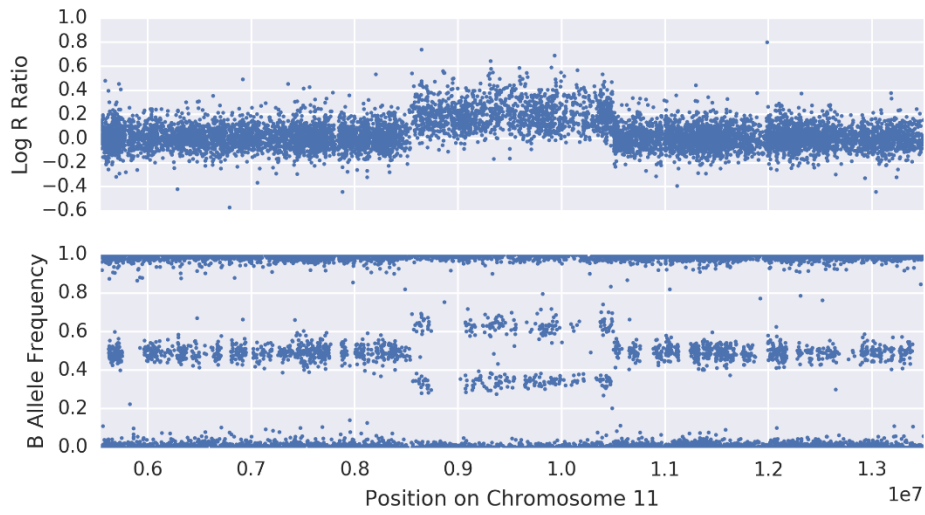

**Supplemental Note Figure 25:** Subject P11. chr11: 8548056- 10497905. Empirical  $P < 10^{-10}$ .

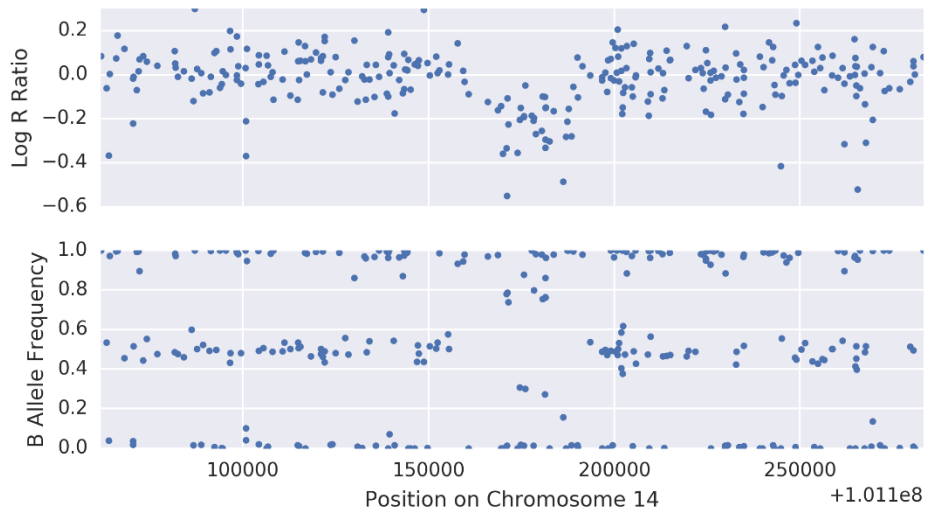

**Supplemental Note Figure 26:** Subject P12. chr14: 101261679- 101288013. Empirical  $P < 0.0002$ .



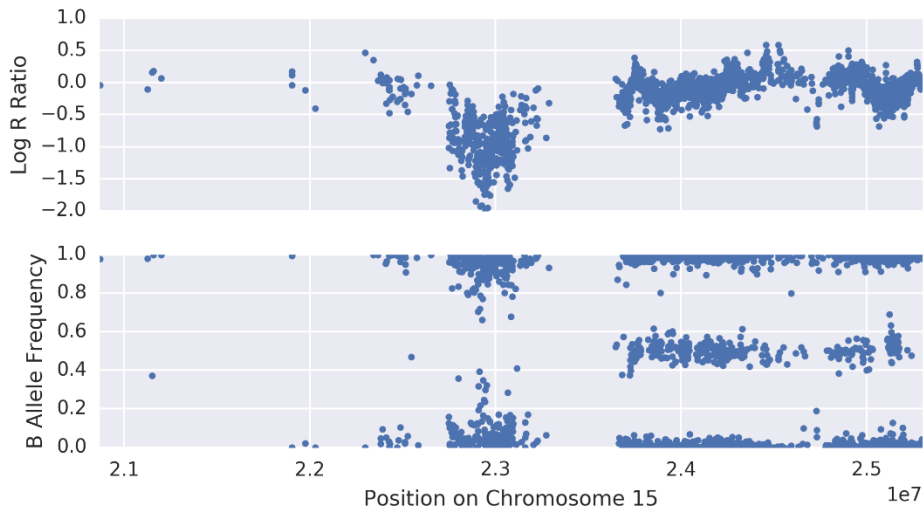

**Supplemental Note Figure 27:** Subject P13. chr15: 22696624- 23301066. Empirical  $P < 0.01$ . Note that this was a low quality array sample (LogRDev = 0.33), which was deemed suitable for sample tracking but would not normally be used in CNV analysis. We note that in addition to the significant depth change, we also see an absence of heterozygous variants which lends further support to the deletion call.

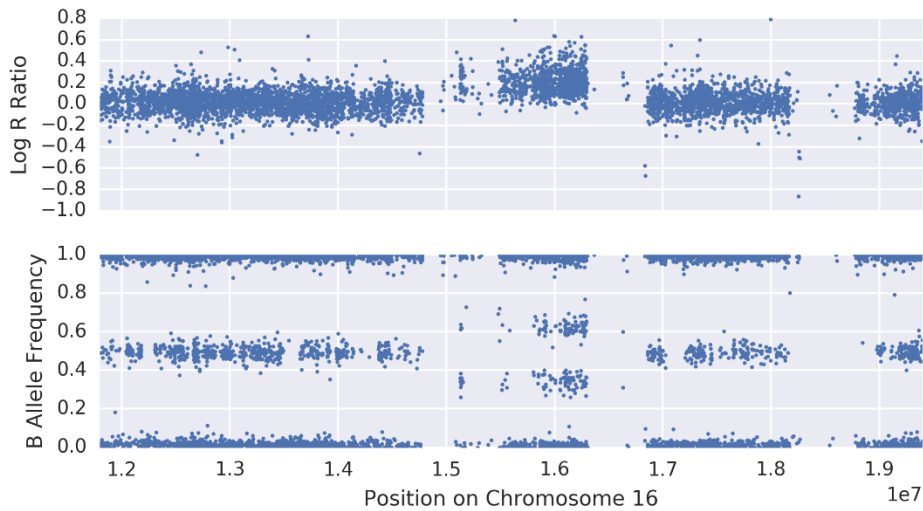

**Supplemental Note Figure 28:** Subject P14. chr16: 14800000- 16400000. Empirical  $P < 10^{-10}$ .

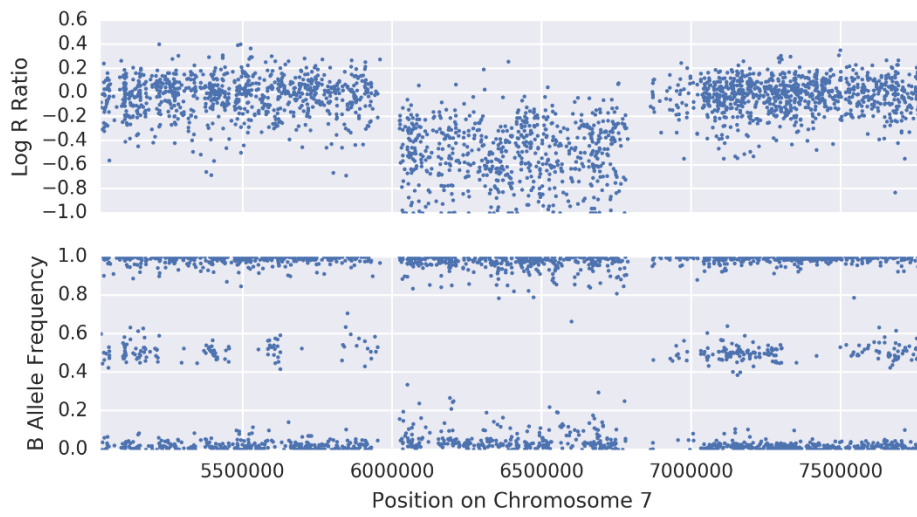

**Supplemental Note Figure 29:** Subject P15. Chr7: 6027017- 6776186. Empirical  $P < 10^{-10}$ .

## *de novo* CNV phasing models

For *de-novo* CNVs we observe the inheritance patterns of small variants to decipher parental haplotype on which a CNV resides.

### Deletion phasing

Here we simply compare inheritance of variants under the assumption of the deletion being on either the maternal or paternal alleles.

**Supplemental Note Table 2:** Model assuming deletion on paternal allele (all variants inherited from mother):

| mother | father | CN-0 | CN-1 |
|--------|--------|------|------|
| 0/0    | 0/1    | 1.0  | 0.0  |
|        | 1/1    | 1.0  | 0.0  |
| 0/1    | 0/0    | 0.5  | 0.5  |
|        | 0/1    | 0.5  | 0.5  |
|        | 1/1    | 0.5  | 0.5  |
| 1/1    | 0/0    | 0.0  | 1.0  |
|        | 0/1    | 0.0  | 1.0  |

### Example deletion:

3MB deletion on the paternal allele. See Supplemental Note Figure 8 for illustration of model transition frequencies.

### Model log-likelihoods:

|        |              |
|--------|--------------|
| father | -2472.071702 |
| mother | -6295.203394 |

**Prediction:** *de novo* deletion on paternal allele.

|               |         |       |        |
|---------------|---------|-------|--------|
| mother-father | 0/0-0/1 | 1     | 0.0018 |
|               | 0/0-1/1 | 0.97  | 0.033  |
|               | 0/1-0/0 | 0.5   | 0.5    |
|               | 0/1-0/1 | 0.62  | 0.38   |
|               | 0/1-1/1 | 0.42  | 0.58   |
|               | 1/1-0/0 | 0.084 | 0.92   |
|               | 1/1-0/1 | 0.065 | 0.93   |
|               |         | CN-0  | CN-1   |
|               | proband |       |        |

**Supplemental Note Figure 8:** Transition frequencies for example deletion.

## Gain phasing

For gains, there are four possible scenarios. A gain may be of maternal or paternal origin, and be either simple or complex. By simple we refer to a duplication of a single allele, while a complex gain refers to the scenario where a proband can inherit material from both parents' copies of the DNA segment (an example of this is in an unbalanced translocation). Additionally, rather than having two copy states as in the case of deletions, gains have four possible variant copy states.

**Supplemental Note Table 3:** Model assuming a simple duplication of a maternal allele:

| mother | father | CN-0 | CN-1 | CN-2 | CN-3 |
|--------|--------|------|------|------|------|
| 0/0    | 0/1    | 0.50 | 0.50 | 0.00 | 0.00 |
|        | 1/1    | 0.00 | 1.00 | 0.00 | 0.00 |
| 0/1    | 0/0    | 0.50 | 0.00 | 0.50 | 0.00 |
|        | 0/1    | 0.25 | 0.25 | 0.25 | 0.25 |
|        | 1/1    | 0.00 | 0.50 | 0.00 | 0.50 |
| 1/1    | 0/0    | 0.00 | 0.00 | 1.00 | 0.00 |
|        | 0/1    | 0.00 | 0.00 | 0.50 | 0.50 |

**Supplemental Note Table 4:** Model assuming inheritance of **both maternal alleles** (along with one paternal allele):

| mother | father | CN-0 | CN-1 | CN-2 | CN-3 |
|--------|--------|------|------|------|------|
| 0/0    | 0/1    | 0.5  | 0.5  | 0.0  | 0.0  |
|        | 1/1    | 0.0  | 1.0  | 0.0  | 0.0  |
| 0/1    | 0/0    | 0.0  | 1.0  | 0.0  | 0.0  |
|        | 0/1    | 0.0  | 0.5  | 0.5  | 0.0  |
|        | 1/1    | 0.0  | 0.0  | 1.0  | 0.0  |
| 1/1    | 0/0    | 0.0  | 0.0  | 1.0  | 0.0  |
|        | 0/1    | 0.0  | 0.0  | 0.5  | 0.5  |

**Example gain:**

7MB deletion on the paternal allele. Allele fraction across genotypes clearly shows the dependence of copy number state on parental genotypes (**Supplemental Note Figure 9**).

**Model likelihoods:**

```
father-complex      -7948
father-dup          -26755
mother-complex      -19933
mother-dup          -24622
```

**Prediction:** The gain is resultant from inheritance of both paternal alleles, along with a single maternal allele.

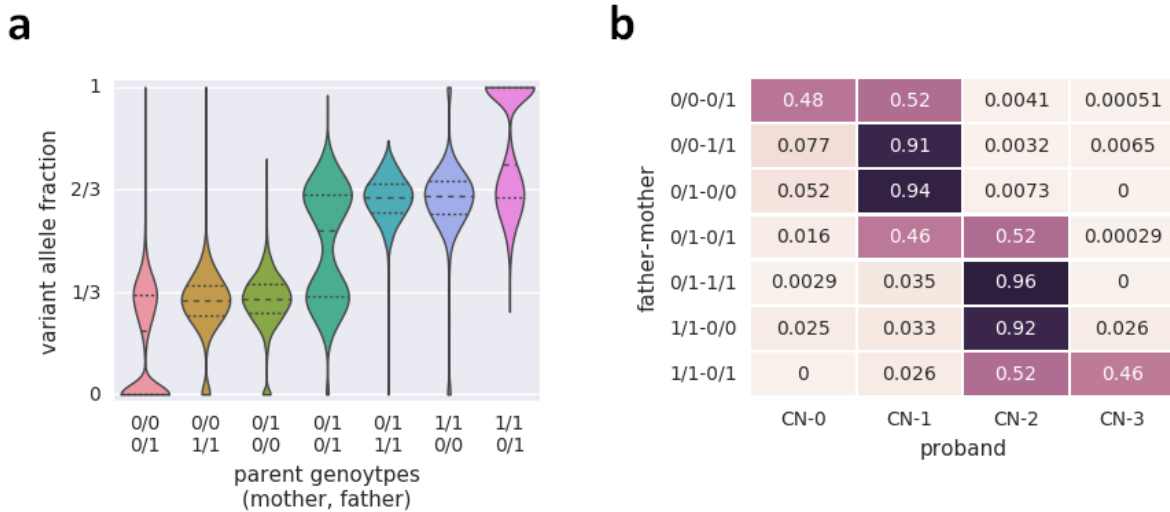

**Supplemental Note Figure 9:** Variant allele fraction across parental genotypes (**a**) and copy-number state transition frequencies (**b**) for example duplication.

## Supplemental References

1. Sudmant PH, Rausch T, Gardner EJ, et al. An integrated map of structural variation in 2,504 human genomes. *Nature*. 2015;526(7571):75-81.
2. Spies N, Zook JM, Salit M, Sidow A. svviz: a read viewer for validating structural variants. *Bioinformatics*. 2015;31(24):3994-3996.
3. Tang Z, Berlin DS, Toji L, et al. A dynamic database of microarray-characterized cell lines with various cytogenetic and genomic backgrounds. *G3*. 2013;3(7):1143-1149.
4. Yang TP, Patel PI, Chinault AC, et al. Molecular evidence for new mutation at the hpvt locus in Lesch-Nyhan patients. *Nature*. 1984;310(5976):412-414.
5. Yang TP, Stout JT, Konecki DS, Patel PI, Alford RL, Caskey CT. Spontaneous reversion of novel Lesch-Nyhan mutation by HPRT gene rearrangement. *Somat Cell Mol Genet*. 1988;14(3):293-303.
6. Monnat RJ Jr, Chiaverotti TA, Hackmann AF, Maresh GA. Molecular structure and genetic stability of human hypoxanthine phosphoribosyltransferase (HPRT) gene duplications. *Genomics*. 1992;13(3):788-796.
